# Supplementary material for: Tissue-based metabolomics reveals metabolic signatures and major metabolic pathways of gastric cancer with help of transcriptomic data from TCGA
Source: PubMed Central journal article supplement (PMC8490861; doi:10.1042/bsr20211476), 2021-10-04
Supplement: BSR-2021-1476_supp.pdf [file BSR-2021-1476_supp.pdf]

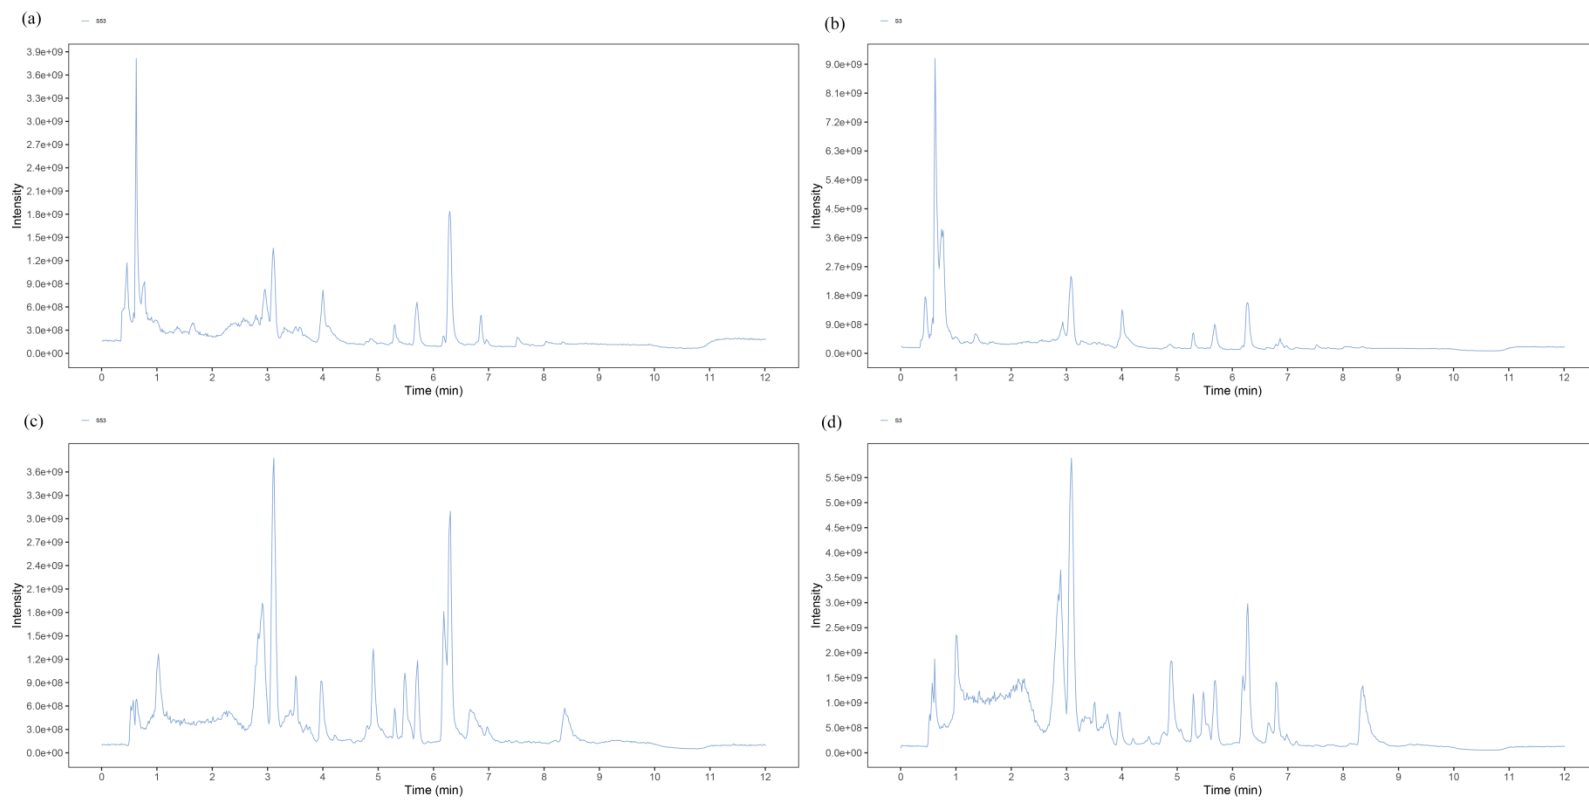

Fig S1 UHPLC-QE-MS ion chromatograms of GC and PC tissue. Negative ion mode of GC tissue (a) and PC tissue (b), and positive ion mode of GC tissue (c) and PC tissue (d) of the same patient.

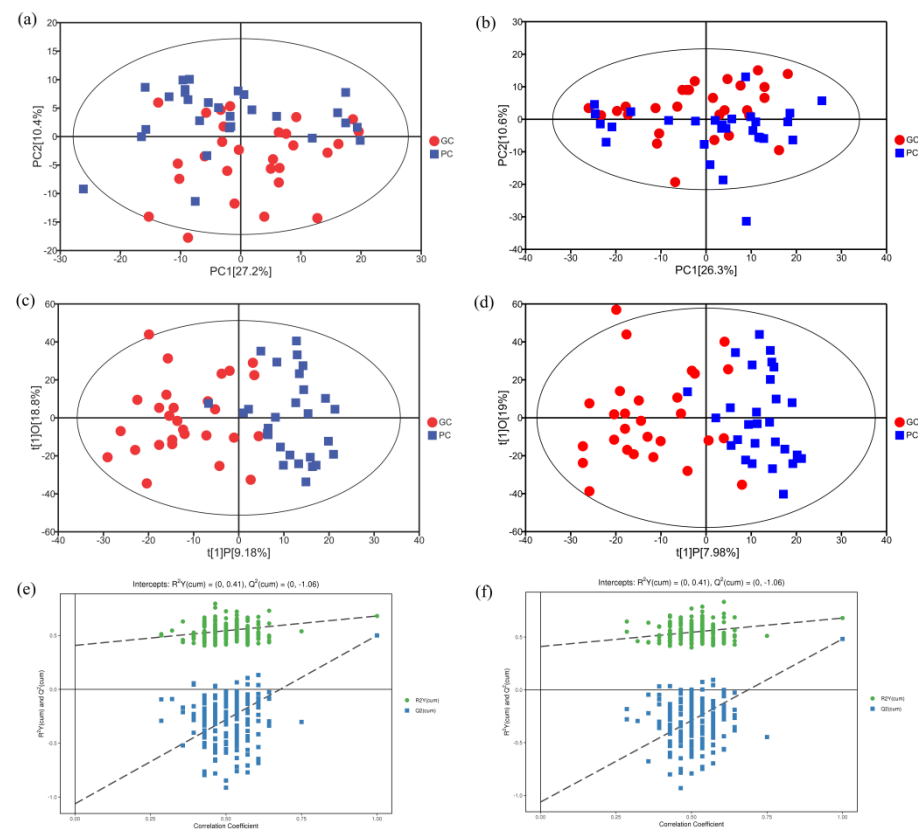

Fig S2 Identification of discriminating biomarkers by metabolome analysis. The PCA (a) and OPLS-DA (c) score plot and OPLS-DA (e) model are in negative ion mode. PCA (b) and OPLS-DA (d) score plot and OPLS-DA (f) model are in positive ion mode. The abscissa represents correlation between random group and original group, and ordinate represents scores of R2Y and Q2. When permutation retention is 1, the values of Q2 and R2Y are close to 0.5 and 1 respectively, and Q2 is with positive slope showing that models have good predictability and do not overfit.

Table S1 Details of 325 key metabolites identified by metabonomics

| Ionization models | Metabolites                      | rt     | m/z    | Relative expression |          | VIP  | P value | LogFC |
|-------------------|----------------------------------|--------|--------|---------------------|----------|------|---------|-------|
|                   |                                  |        |        | GC group            | PC group |      |         |       |
| NEG               | Dodecanoic acid                  | 49.80  | 199.17 | 2.91                | 1.40     | 2.31 | 0.00001 | 1.05  |
| NEG               | Linoelaidic acid                 | 39.75  | 279.23 | 136.28              | 72.19    | 2.03 | 0.00006 | 0.92  |
| NEG               | 4-Hydroxy tolbutamide            | 278.53 | 285.09 | 0.96                | 0.35     | 1.86 | 0.00010 | 1.46  |
| NEG               | 3-Hydroxymethylglutaric acid     | 412.25 | 161.04 | 1.61                | 1.06     | 2.28 | 0.00033 | 0.60  |
| NEG               | Ethyl dodecanoate                | 39.76  | 227.20 | 3.98                | 1.85     | 1.78 | 0.00034 | 1.10  |
| NEG               | myo-Inositol                     | 412.20 | 179.06 | 19.74               | 11.63    | 2.29 | 0.00034 | 0.76  |
| NEG               | Deoxyinosine                     | 199.11 | 251.08 | 0.17                | 0.33     | 2.17 | 0.00036 | -0.94 |
| NEG               | Alpha-dimorphelic acid           | 55.35  | 295.23 | 1.75                | 0.81     | 1.22 | 0.00076 | 1.12  |
| NEG               | 5Z-Dodecenoic acid               | 50.21  | 197.15 | 0.76                | 0.33     | 1.39 | 0.00085 | 1.19  |
| NEG               | N-Acetyl-glucosamine 1-phosphate | 466.09 | 300.05 | 0.15                | 0.28     | 1.71 | 0.00106 | -0.88 |
| NEG               | Isopalmitic acid                 | 39.75  | 255.23 | 113.86              | 58.91    | 1.77 | 0.00109 | 0.95  |
| NEG               | m-Coumaric acid                  | 61.15  | 163.04 | 0.70                | 1.16     | 2.04 | 0.00111 | -0.73 |
| NEG               | D-Xylitol                        | 101.23 | 151.06 | 2.47                | 1.54     | 1.46 | 0.00151 | 0.68  |
| NEG               | Prostaglandin E2                 | 47.35  | 351.22 | 0.47                | 0.30     | 1.32 | 0.00164 | 0.66  |
| NEG               | Palmitoleic acid                 | 40.67  | 253.22 | 16.46               | 8.19     | 1.47 | 0.00193 | 1.01  |
| NEG               | beta-D-Glucosamine               | 415.01 | 214.05 | 3.61                | 1.24     | 1.41 | 0.00230 | 1.54  |
| NEG               | Oleic acid                       | 100.03 | 281.25 | 2.56                | 1.74     | 1.84 | 0.00264 | 0.55  |
| NEG               | Ricinoleic acid                  | 55.24  | 297.24 | 0.50                | 0.31     | 1.34 | 0.00298 | 0.70  |
| NEG               | Bovinic acid                     | 205.20 | 279.23 | 0.65                | 0.43     | 1.79 | 0.00374 | 0.59  |
| NEG               | 2-Keto-3-deoxy-D-gluconic acid   | 152.33 | 177.04 | 3.24                | 2.12     | 1.98 | 0.00404 | 0.61  |
| NEG               | N-Acetylaspartylglutamic acid    | 463.91 | 303.08 | 0.14                | 0.09     | 1.92 | 0.00413 | 0.64  |
| NEG               | Prostaglandin D2                 | 75.64  | 351.22 | 0.52                | 0.19     | 1.15 | 0.00551 | 1.41  |
| NEG               | Resolvin D2                      | 45.48  | 375.22 | 0.64                | 0.27     | 1.78 | 0.00598 | 1.22  |

|     |                                       |        |        |       |       |      |         |       |
|-----|---------------------------------------|--------|--------|-------|-------|------|---------|-------|
| NEG | D-Glutamine                           | 411.50 | 145.06 | 3.31  | 2.68  | 2.06 | 0.00692 | 0.31  |
| NEG | 16-Hydroxy hexadecanoic acid          | 57.48  | 271.23 | 0.65  | 0.86  | 1.60 | 0.00715 | -0.42 |
| NEG | Uridine                               | 177.06 | 243.06 | 40.32 | 33.16 | 1.89 | 0.00831 | 0.28  |
| NEG | Cholesterol sulfate                   | 25.96  | 465.30 | 6.51  | 27.67 | 2.02 | 0.00876 | -2.09 |
| NEG | Guanine                               | 253.11 | 150.04 | 0.56  | 0.30  | 1.91 | 0.01065 | 0.90  |
| NEG | Cytidine                              | 262.43 | 242.08 | 0.08  | 0.04  | 1.77 | 0.01316 | 0.97  |
| NEG | Ethyl glucuronide                     | 65.42  | 221.07 | 0.05  | 0.28  | 2.08 | 0.02295 | -2.44 |
| NEG | N-Acetyl-L-aspartic acid              | 414.61 | 174.04 | 3.76  | 2.53  | 1.13 | 0.02818 | 0.57  |
| NEG | Hypogeic acid                         | 99.77  | 253.22 | 0.51  | 0.39  | 1.46 | 0.03328 | 0.38  |
| NEG | Beta-Guanidinopropionic acid          | 372.07 | 130.06 | 3.32  | 2.56  | 1.72 | 0.03510 | 0.37  |
| NEG | Gluconolactone                        | 50.28  | 177.04 | 0.88  | 1.09  | 1.36 | 0.03517 | -0.31 |
| NEG | Imidazoleacetic acid                  | 71.72  | 125.03 | 0.59  | 1.34  | 2.01 | 0.04592 | -1.20 |
| POS | PC(16:0/16:0)                         | 176.63 | 734.57 | 4.87  | 8.89  | 2.86 | 0.00000 | -0.87 |
| POS | 1-Methylnicotinamide                  | 324.25 | 137.07 | 2.29  | 7.68  | 2.89 | 0.00000 | -1.75 |
| POS | PC(20:1(11Z)/20:4(5Z,8Z,11Z,14Z))     | 166.83 | 836.61 | 0.70  | 1.07  | 2.79 | 0.00001 | -0.61 |
| POS | PC(24:1(15Z)/18:4(6Z,9Z,12Z,15Z))     | 165.04 | 864.64 | 0.03  | 0.06  | 2.71 | 0.00002 | -1.13 |
| POS | PC(15:0/15:0)                         | 177.98 | 706.54 | 0.94  | 1.96  | 2.73 | 0.00006 | -1.07 |
| POS | gamma-Glutamylleucine                 | 436.56 | 261.14 | 0.05  | 0.02  | 1.78 | 0.00019 | 1.00  |
| POS | PC(P-18:1(11Z)/22:2(13Z,16Z))         | 166.81 | 824.65 | 0.02  | 0.10  | 1.98 | 0.00042 | -2.49 |
| POS | N4-Acetylcytidine                     | 344.12 | 286.10 | 0.49  | 0.28  | 1.67 | 0.00050 | 0.82  |
| POS | Camelinin                             | 421.21 | 262.13 | 0.32  | 0.15  | 2.17 | 0.00051 | 1.07  |
| POS | PC(20:3(8Z,11Z,14Z)/20:1(11Z))        | 39.64  | 838.63 | 0.16  | 0.28  | 1.99 | 0.00081 | -0.80 |
| POS | PC(20:5(5Z,8Z,11Z,14Z,17Z)/20:1(11Z)) | 166.81 | 834.60 | 0.93  | 1.31  | 2.32 | 0.00099 | -0.50 |
| POS | Carvyl propionate                     | 34.12  | 209.15 | 0.01  | 0.02  | 1.29 | 0.00103 | -0.81 |
| POS | Acetylcholine                         | 226.98 | 146.12 | 0.97  | 0.45  | 2.21 | 0.00111 | 1.12  |
| POS | PC(16:0/15:0)                         | 177.54 | 720.55 | 0.22  | 0.51  | 2.49 | 0.00115 | -1.17 |
| POS | PE(22:4(7Z,10Z,13Z,16Z)/14:0)         | 173.08 | 740.52 | 1.08  | 0.65  | 1.31 | 0.00128 | 0.74  |
| POS | Dehydrophytosphingosine               | 154.25 | 316.28 | 0.01  | 0.02  | 1.32 | 0.00128 | -1.22 |

|     |                                                     |        |        |      |      |      |         |       |
|-----|-----------------------------------------------------|--------|--------|------|------|------|---------|-------|
| POS | PC(14:0/14:0)                                       | 179.35 | 678.50 | 0.03 | 0.08 | 2.25 | 0.00164 | -1.44 |
| POS | 5'-Methylthioadenosine                              | 93.99  | 298.10 | 0.11 | 0.23 | 1.53 | 0.00192 | -1.11 |
| POS | PC(20:5(5Z,8Z,11Z,14Z,17Z)/15:0)                    | 171.28 | 766.54 | 0.98 | 0.53 | 1.11 | 0.00212 | 0.90  |
| POS | PC(22:6(4Z,7Z,10Z,13Z,16Z,19Z)/22:2(13Z,16Z))       | 163.23 | 886.63 | 0.02 | 0.05 | 2.33 | 0.00219 | -1.07 |
| POS | p-Cresol glucuronide                                | 217.42 | 285.10 | 0.05 | 0.03 | 1.53 | 0.00246 | 0.67  |
| POS | Adenine                                             | 231.63 | 136.06 | 1.90 | 1.17 | 1.71 | 0.00292 | 0.70  |
| POS | PC(18:2(9Z,12Z)/P-18:1(11Z))                        | 167.72 | 768.59 | 0.91 | 1.41 | 1.73 | 0.00306 | -0.63 |
| POS | PE(P-18:1(9Z)/16:1(9Z))                             | 172.19 | 700.53 | 0.17 | 0.37 | 1.76 | 0.00354 | -1.08 |
| POS | PC(18:1(11Z)/14:0)                                  | 175.74 | 732.55 | 3.39 | 6.60 | 2.39 | 0.00389 | -0.96 |
| POS | Sphinganine                                         | 134.34 | 302.30 | 0.04 | 0.17 | 2.45 | 0.00419 | -2.18 |
| POS | Iminoerythrose 4-phosphate                          | 434.61 | 200.03 | 0.15 | 0.06 | 1.37 | 0.00433 | 1.41  |
| POS | 8-Acetoxy-4'-methoxypinoresinol 4-glucoside         | 435.22 | 593.21 | 0.02 | 0.01 | 1.64 | 0.00473 | 1.88  |
| POS | Prolylhydroxyproline                                | 443.81 | 229.12 | 0.15 | 0.32 | 1.71 | 0.00578 | -1.08 |
| POS | PC(16:0/P-16:0)                                     | 173.03 | 718.57 | 0.12 | 0.42 | 2.66 | 0.00592 | -1.82 |
| POS | Serylalanine                                        | 78.45  | 177.09 | 0.09 | 0.23 | 1.45 | 0.00610 | -1.44 |
| POS | Sphingosine                                         | 86.34  | 300.29 | 0.68 | 1.72 | 2.11 | 0.00633 | -1.33 |
| POS | D-Alanyl-D-alanine                                  | 63.32  | 161.09 | 0.20 | 0.47 | 1.50 | 0.00681 | -1.28 |
| POS | PC(18:1(11Z)/P-16:0)                                | 171.26 | 744.59 | 0.60 | 1.06 | 1.89 | 0.00765 | -0.82 |
| POS | 7-Ketodeoxycholic acid                              | 35.22  | 424.36 | 0.10 | 0.05 | 1.51 | 0.00809 | 1.11  |
| POS | PC(20:4(8Z,11Z,14Z,17Z)/P-18:0)                     | 165.94 | 794.61 | 1.72 | 2.10 | 1.70 | 0.00839 | -0.29 |
| POS | PC(22:5(4Z,7Z,10Z,13Z,16Z)/20:5(5Z,8Z,11Z,14Z,17Z)) | 163.18 | 854.57 | 0.02 | 0.04 | 1.66 | 0.00963 | -0.76 |
| POS | Alanyl-Leucine                                      | 43.40  | 203.14 | 0.12 | 0.27 | 1.66 | 0.01134 | -1.24 |
| POS | 2-Pyrrolidinone                                     | 394.91 | 86.06  | 0.14 | 0.30 | 1.84 | 0.01238 | -1.08 |
| POS | N-Acetylputrescine                                  | 353.96 | 131.12 | 0.05 | 0.14 | 2.44 | 0.01253 | -1.56 |
| POS | gamma-Aminobutyric acid                             | 394.91 | 104.07 | 0.60 | 1.25 | 1.80 | 0.01271 | -1.07 |
| POS | Glycerophosphocholine                               | 451.99 | 258.11 | 0.32 | 0.14 | 1.23 | 0.01283 | 1.20  |
| POS | Carnosine                                           | 442.81 | 227.11 | 0.06 | 0.03 | 1.45 | 0.01308 | 1.06  |
| POS | PC(18:0/P-16:0)                                     | 172.46 | 746.60 | 0.69 | 1.03 | 2.11 | 0.01312 | -0.57 |

|     |                                                          |        |        |       |       |      |         |       |
|-----|----------------------------------------------------------|--------|--------|-------|-------|------|---------|-------|
| POS | NAD                                                      | 458.77 | 664.11 | 0.04  | 0.01  | 2.39 | 0.01448 | 1.54  |
| POS | L-Gulose                                                 | 412.12 | 203.05 | 0.44  | 0.26  | 1.61 | 0.01470 | 0.75  |
| POS | Lactosylceramide (d18:1/16:0)                            | 212.84 | 862.62 | 0.01  | 0.04  | 1.44 | 0.01534 | -1.30 |
| POS | PC(20:2(11Z,14Z)/14:0)                                   | 105.24 | 758.57 | 21.15 | 12.30 | 1.20 | 0.01626 | 0.78  |
| POS | L-Acetylcarnitine                                        | 329.04 | 204.12 | 49.59 | 43.15 | 1.49 | 0.01716 | 0.20  |
| POS | Koeniginequinone A                                       | 429.22 | 242.08 | 1.52  | 0.60  | 1.10 | 0.01787 | 1.34  |
| POS | 4-Methoxybenzyl propanoate                               | 409.37 | 195.10 | 0.12  | 0.14  | 1.64 | 0.02017 | -0.26 |
| POS | PS(18:0/20:4(5Z,8Z,11Z,14Z))                             | 221.68 | 812.54 | 0.26  | 0.36  | 1.22 | 0.02060 | -0.48 |
| POS | SM(d18:0/14:0)                                           | 208.09 | 677.55 | 0.04  | 0.07  | 1.17 | 0.02173 | -0.70 |
| POS | PI(18:1(11Z)/20:4(5Z,8Z,11Z,14Z))                        | 215.80 | 885.55 | 0.04  | 0.05  | 1.03 | 0.02257 | -0.28 |
| POS | Pantothenic acid                                         | 290.45 | 220.12 | 0.15  | 0.11  | 1.18 | 0.02319 | 0.47  |
| POS | Prolyl-Valine                                            | 309.74 | 215.14 | 0.03  | 0.05  | 1.30 | 0.02344 | -0.99 |
| POS | Valyl-Threonine                                          | 57.71  | 219.13 | 0.04  | 0.07  | 1.33 | 0.02426 | -0.98 |
| POS | 4-Hydroxy-2-butenic acid gamma-lactone                   | 329.04 | 85.03  | 0.89  | 0.78  | 1.44 | 0.02491 | 0.20  |
| POS | PC(16:1(9Z)/14:0)                                        | 177.53 | 704.52 | 0.07  | 0.24  | 2.27 | 0.02561 | -1.84 |
| POS | Succinic acid semialdehyde                               | 375.45 | 125.02 | 0.04  | 0.03  | 1.21 | 0.02633 | 0.41  |
| POS | 3,4-Dihydroxy-2-hydroxymethyl-1-pyrrolidinepropanamide   | 69.43  | 205.12 | 0.02  | 0.06  | 1.45 | 0.02872 | -1.22 |
| POS | D-erythro-D-galacto-octitol                              | 436.96 | 243.11 | 0.02  | 0.02  | 1.26 | 0.03099 | 0.28  |
| POS | SM(d18:1/14:0)                                           | 211.29 | 675.54 | 1.07  | 1.34  | 1.21 | 0.03238 | -0.32 |
| POS | PE(P-18:1(9Z)/20:4(5Z,8Z,11Z,14Z))                       | 165.05 | 750.54 | 4.01  | 3.49  | 1.83 | 0.03390 | 0.20  |
| POS | Linoelaidyl carnitine                                    | 204.48 | 424.34 | 3.51  | 2.19  | 1.18 | 0.03511 | 0.68  |
| POS | N-Methylnicotinamide                                     | 46.84  | 137.07 | 0.24  | 0.34  | 1.45 | 0.03527 | -0.50 |
| POS | Cytarabine                                               | 261.97 | 244.09 | 0.13  | 0.08  | 1.34 | 0.03715 | 0.79  |
| POS | PC(18:1(9Z)/P-18:1(11Z))                                 | 62.25  | 770.60 | 0.27  | 0.39  | 1.46 | 0.03768 | -0.51 |
| POS | Glucosyl (2E,6E,10x)-10,11-dihydroxy-2,6-farnesadienoate | 485.73 | 433.24 | 0.01  | 0.01  | 1.45 | 0.03841 | 0.63  |
| POS | Dihydrobiopterin                                         | 545.04 | 240.11 | 0.02  | 0.01  | 1.01 | 0.03948 | 0.85  |
| POS | PC(20:5(5Z,8Z,11Z,14Z,17Z)/P-18:1(11Z))                  | 164.14 | 790.57 | 0.18  | 0.26  | 1.36 | 0.03951 | -0.53 |
| POS | Triethanolamine                                          | 153.27 | 150.11 | 0.32  | 0.17  | 1.50 | 0.03971 | 0.93  |

|     |                                    |        |        |       |       |      |         |       |
|-----|------------------------------------|--------|--------|-------|-------|------|---------|-------|
| POS | Formiminoglutamic acid             | 234.48 | 175.07 | 0.09  | 0.15  | 1.45 | 0.04346 | -0.81 |
| POS | Phosphoribosyl-AMP                 | 444.18 | 560.08 | 0.01  | 0.00  | 1.32 | 0.04541 | 0.92  |
| POS | PE(14:1(9Z)/18:0)                  | 178.74 | 690.51 | 0.04  | 0.07  | 1.73 | 0.04631 | -0.74 |
| POS | 9-O-Methylcoumestrol               | 355.05 | 283.06 | 0.04  | 0.06  | 1.34 | 0.04715 | -0.74 |
| NEG | Myristoleic acid                   | 99.98  | 225.19 | 0.39  | 0.35  | 0.96 | 0.22221 | 0.14  |
| NEG | Prostaglandin B2                   | 75.84  | 333.21 | 0.42  | 0.15  | 0.95 | 0.00660 | 1.45  |
| NEG | Undecanoic acid                    | 49.03  | 185.15 | 0.49  | 0.62  | 0.95 | 0.05168 | -0.34 |
| NEG | Glucose 1-phosphate                | 498.95 | 259.02 | 0.11  | 0.17  | 0.92 | 0.05553 | -0.62 |
| NEG | L-Tyrosine                         | 331.08 | 180.07 | 0.91  | 0.95  | 0.91 | 0.91608 | -0.05 |
| NEG | Inosinic acid                      | 468.37 | 347.04 | 0.16  | 0.05  | 0.91 | 0.02455 | 1.57  |
| NEG | D-Aspartic acid                    | 478.12 | 132.03 | 0.31  | 0.22  | 0.90 | 0.08038 | 0.47  |
| NEG | 2-Hydroxystearic acid              | 55.69  | 299.26 | 0.22  | 0.23  | 0.89 | 0.79510 | -0.05 |
| NEG | Phenylpyruvic acid                 | 81.88  | 163.04 | 0.74  | 0.99  | 0.88 | 0.05802 | -0.42 |
| NEG | Pentadecanoic acid                 | 46.84  | 241.22 | 1.03  | 0.74  | 0.87 | 0.06250 | 0.48  |
| NEG | Pelargonic acid                    | 54.31  | 157.12 | 15.82 | 15.26 | 0.86 | 0.48368 | 0.05  |
| NEG | ADP                                | 480.82 | 426.02 | 0.06  | 0.06  | 0.86 | 0.99530 | 0.00  |
| NEG | 16(17)-EpDPE                       | 51.67  | 343.23 | 0.03  | 0.04  | 0.86 | 0.33807 | -0.49 |
| NEG | 7-Methylguanosine                  | 218.40 | 296.10 | 0.03  | 0.04  | 0.86 | 0.81908 | -0.18 |
| NEG | LysoPE(18:1(9Z)/0:0)               | 228.21 | 478.29 | 7.83  | 2.20  | 0.83 | 0.04203 | 1.83  |
| NEG | D-Malic acid                       | 418.23 | 133.01 | 0.09  | 0.10  | 0.82 | 0.33959 | -0.16 |
| NEG | Fexofenadine                       | 220.00 | 500.28 | 0.56  | 0.40  | 0.81 | 0.61878 | 0.47  |
| NEG | Pyrrolidonecarboxylic acid         | 197.04 | 128.03 | 0.81  | 0.78  | 0.80 | 0.74960 | 0.05  |
| NEG | 2'-Deoxyguanosine 5'-monophosphate | 450.82 | 346.06 | 0.40  | 0.24  | 0.79 | 0.14974 | 0.72  |
| NEG | N-Acetyl-L-alanine                 | 271.49 | 130.05 | 0.46  | 0.63  | 0.77 | 0.12301 | -0.44 |
| NEG | 9-Decenoic acid                    | 54.45  | 169.12 | 1.01  | 0.71  | 0.77 | 0.11074 | 0.50  |
| NEG | Pseudouridine                      | 264.75 | 243.06 | 0.25  | 0.24  | 0.76 | 0.84482 | 0.06  |
| NEG | Succinic acid                      | 408.07 | 117.02 | 11.93 | 11.35 | 0.76 | 0.51276 | 0.07  |
| NEG | 2-Hydroxyethanesulfonate           | 159.35 | 124.99 | 6.15  | 4.85  | 0.76 | 0.06300 | 0.35  |

|     |                                |        |        |        |       |      |         |       |
|-----|--------------------------------|--------|--------|--------|-------|------|---------|-------|
| NEG | LysoPA(16:0/0:0)               | 225.45 | 409.24 | 0.03   | 0.02  | 0.75 | 0.00942 | 0.90  |
| NEG | Arachidonic acid               | 39.03  | 303.23 | 103.33 | 71.26 | 0.75 | 0.04725 | 0.54  |
| NEG | 2-Furoic acid                  | 73.05  | 111.01 | 0.26   | 0.26  | 0.73 | 0.92862 | -0.01 |
| NEG | 2-Hydroxy-3-methylbutyric acid | 177.41 | 117.05 | 2.32   | 2.63  | 0.72 | 0.46134 | -0.18 |
| NEG | Hydrocinnamic acid             | 92.54  | 149.06 | 3.43   | 3.58  | 0.69 | 0.97015 | -0.06 |
| NEG | Theaflavin                     | 451.34 | 563.12 | 0.14   | 0.14  | 0.67 | 0.86140 | -0.03 |
| NEG | Capric acid                    | 51.70  | 171.14 | 3.95   | 2.75  | 0.67 | 0.13768 | 0.52  |
| NEG | L-Aspartic acid                | 432.74 | 132.03 | 3.80   | 2.32  | 0.67 | 0.05704 | 0.71  |
| NEG | Docosahexaenoic acid           | 39.25  | 327.23 | 5.79   | 5.45  | 0.65 | 0.75580 | 0.09  |
| NEG | Pantothenic acid               | 292.55 | 218.10 | 1.09   | 0.93  | 0.65 | 0.32014 | 0.23  |
| NEG | 6-Keto-prostaglandin F1a       | 229.39 | 369.23 | 0.04   | 0.05  | 0.64 | 0.89050 | -0.07 |
| NEG | N-Acetyl-L-methionine          | 220.88 | 190.05 | 0.99   | 1.00  | 0.64 | 0.95089 | -0.01 |
| NEG | Isohyodeoxycholic acid         | 162.59 | 391.29 | 0.02   | 0.13  | 0.63 | 0.39206 | -2.43 |
| NEG | Prostaglandin D1               | 110.05 | 353.23 | 0.22   | 0.10  | 0.63 | 0.06020 | 1.12  |
| NEG | Hydrogen phosphate             | 181.29 | 96.97  | 0.20   | 0.18  | 0.62 | 0.20308 | 0.12  |
| NEG | Hydroxyisocaproic acid         | 155.89 | 131.07 | 1.40   | 1.90  | 0.61 | 0.60818 | -0.43 |
| NEG | Tridecanoic acid               | 37.68  | 213.19 | 0.51   | 0.61  | 0.60 | 0.07188 | -0.27 |
| NEG | Eicosadienoic acid             | 38.94  | 307.26 | 4.34   | 3.38  | 0.59 | 0.06517 | 0.36  |
| NEG | L-Cystine                      | 124.20 | 239.02 | 0.06   | 0.09  | 0.59 | 0.43292 | -0.45 |
| NEG | L-Erythrulose                  | 649.64 | 119.03 | 9.02   | 8.62  | 0.58 | 0.35607 | 0.07  |
| NEG | Erucic acid                    | 39.39  | 337.31 | 1.04   | 0.76  | 0.57 | 0.34210 | 0.46  |
| NEG | Cytidine monophosphate         | 454.19 | 322.04 | 0.29   | 0.17  | 0.57 | 0.01051 | 0.77  |
| NEG | Ethyl oleate                   | 38.88  | 309.28 | 6.03   | 3.48  | 1.22 | 0.05857 | 0.79  |
| NEG | Pyruvic acid                   | 141.54 | 87.01  | 66.00  | 57.87 | 1.23 | 0.06969 | 0.19  |
| NEG | Uracil                         | 100.13 | 111.02 | 5.45   | 7.23  | 1.41 | 0.08381 | -0.41 |
| NEG | N-Acetylserine                 | 320.15 | 146.04 | 0.82   | 1.05  | 1.50 | 0.08823 | -0.35 |
| NEG | Inosine                        | 238.29 | 267.07 | 33.01  | 26.86 | 1.51 | 0.08983 | 0.30  |
| NEG | Adenine                        | 185.97 | 134.05 | 1.53   | 1.05  | 1.29 | 0.10564 | 0.54  |



|     |                                                         |        |        |      |       |      |         |       |
|-----|---------------------------------------------------------|--------|--------|------|-------|------|---------|-------|
| NEG | (10E,12Z)-(9S)-9-Hydroperoxyoctadeca-10,12-dienoic acid | 61.94  | 311.22 | 0.09 | 0.06  | 1.02 | 0.12475 | 0.43  |
| NEG | Guanosine                                               | 288.14 | 282.08 | 1.55 | 1.23  | 1.03 | 0.14902 | 0.33  |
| NEG | Adrenic acid                                            | 38.94  | 331.26 | 4.88 | 5.88  | 1.19 | 0.15079 | -0.27 |
| NEG | Nervonic acid                                           | 39.23  | 365.34 | 0.58 | 0.90  | 1.21 | 0.15096 | -0.63 |
| NEG | L-Allothreonine                                         | 389.27 | 118.05 | 0.75 | 1.08  | 1.17 | 0.16395 | -0.53 |
| NEG | L-Proline                                               | 334.86 | 114.05 | 4.23 | 5.60  | 1.79 | 0.17160 | -0.41 |
| NEG | Xanthine                                                | 235.68 | 151.02 | 6.34 | 8.57  | 1.55 | 0.22235 | -0.43 |
| NEG | Xanthosine                                              | 333.95 | 283.07 | 0.04 | 0.06  | 1.43 | 0.40572 | -0.41 |
| NEG | L-Norleucine                                            | 303.51 | 130.09 | 9.51 | 10.77 | 1.31 | 0.54940 | -0.18 |
| NEG | L-Phenylalanine                                         | 288.87 | 164.07 | 7.02 | 7.79  | 1.12 | 0.69579 | -0.15 |
| NEG | L-Valine                                                | 327.76 | 116.07 | 7.00 | 7.59  | 1.19 | 0.73457 | -0.12 |
| POS | Glycerylphosphorylethanolamine                          | 415.21 | 216.06 | 1.12 | 0.36  | 0.99 | 0.01044 | 1.65  |
| POS | Cymorcin diglucoside                                    | 451.89 | 491.21 | 0.02 | 0.01  | 0.99 | 0.00205 | 1.22  |
| POS | PS(18:0/22:6(4Z,7Z,10Z,13Z,16Z,19Z))                    | 220.79 | 836.54 | 0.17 | 0.21  | 0.99 | 0.14872 | -0.34 |
| POS | Phenylalanyl-Isoleucine                                 | 197.39 | 279.17 | 0.04 | 0.06  | 0.98 | 0.39026 | -0.50 |
| POS | LysoPC(18:3(6Z,9Z,12Z))                                 | 224.56 | 518.32 | 0.28 | 0.19  | 0.97 | 0.03527 | 0.57  |
| POS | LysoPE(16:0/0:0)                                        | 229.96 | 454.29 | 5.74 | 1.74  | 0.97 | 0.11692 | 1.72  |
| POS | Citrulline                                              | 418.75 | 176.10 | 0.28 | 0.48  | 0.97 | 0.18212 | -0.79 |
| POS | Persicaxanthin                                          | 37.18  | 385.27 | 0.27 | 0.32  | 0.95 | 0.37685 | -0.26 |
| POS | PC(20:2(11Z,14Z)/15:0)                                  | 173.07 | 772.58 | 0.99 | 0.82  | 0.95 | 0.32423 | 0.27  |
| POS | L-Valine                                                | 294.92 | 118.09 | 9.07 | 11.65 | 0.95 | 0.11057 | -0.36 |
| POS | Isoniazid alpha-ketoglutaric acid                       | 410.27 | 266.08 | 0.07 | 0.04  | 0.94 | 0.01044 | 0.76  |
| POS | Butyrylcarnitine                                        | 283.73 | 232.15 | 9.57 | 6.75  | 0.94 | 0.04029 | 0.50  |
| POS | PS(18:2(9Z,12Z)/18:0)                                   | 224.45 | 788.54 | 0.19 | 0.25  | 0.93 | 0.01037 | -0.36 |
| POS | Isoleucyl-Valine                                        | 219.84 | 231.17 | 0.06 | 0.08  | 0.92 | 0.26027 | -0.42 |
| POS | Diisopropyl sulfide                                     | 294.96 | 119.09 | 0.43 | 0.55  | 0.92 | 0.11162 | -0.37 |
| POS | alpha-Tocopherolquinone                                 | 22.47  | 447.38 | 0.01 | 0.01  | 0.91 | 0.13010 | 0.34  |
| POS | L-2-Amino-5-hydroxypentanoic acid                       | 50.86  | 134.08 | 0.28 | 0.38  | 0.91 | 0.23348 | -0.44 |

|     |                                              |        |        |       |      |      |         |       |
|-----|----------------------------------------------|--------|--------|-------|------|------|---------|-------|
| POS | LysoPE(18:1(9Z)/0:0)                         | 227.36 | 480.31 | 5.48  | 1.61 | 0.91 | 0.02871 | 1.77  |
| POS | Oleamide                                     | 230.14 | 282.28 | 0.06  | 0.02 | 0.91 | 0.13016 | 1.81  |
| POS | Glutaminylaspartic acid                      | 453.37 | 262.10 | 0.08  | 0.08 | 0.91 | 0.98475 | 0.01  |
| POS | 1-Hydroxy-10-methylacridone                  | 408.65 | 226.08 | 3.55  | 1.91 | 0.91 | 0.01839 | 0.89  |
| POS | Guanine                                      | 287.52 | 152.06 | 1.46  | 1.22 | 0.90 | 0.22150 | 0.25  |
| POS | PE(O-16:1(1Z)/22:6(4Z,7Z,10Z,13Z,16Z,19Z))   | 39.75  | 748.53 | 0.32  | 0.35 | 0.90 | 0.52027 | -0.12 |
| POS | Heptadecanoyl carnitine                      | 204.04 | 414.36 | 0.14  | 0.22 | 0.90 | 0.11767 | -0.71 |
| POS | [12]-Gingerol                                | 208.12 | 396.31 | 0.35  | 0.28 | 0.89 | 0.29129 | 0.31  |
| POS | Molybdopterin precursor Z                    | 482.91 | 364.06 | 0.03  | 0.02 | 0.89 | 0.01396 | 0.85  |
| POS | Adenosine 3',5'-diphosphate                  | 481.03 | 428.04 | 0.03  | 0.03 | 0.88 | 0.94929 | -0.02 |
| POS | Phosphocreatine                              | 463.90 | 212.04 | 0.07  | 0.09 | 0.87 | 0.56970 | -0.35 |
| POS | Mangiferdesmethylursanone                    | 32.50  | 429.37 | 0.62  | 0.81 | 0.87 | 0.05516 | -0.38 |
| POS | PS(18:1(9Z)/16:0)                            | 225.55 | 762.53 | 0.08  | 0.08 | 0.86 | 0.66999 | -0.09 |
| POS | 3-Dehydroxycarnitine                         | 399.47 | 146.12 | 4.17  | 4.94 | 0.86 | 0.29802 | -0.25 |
| POS | PI(20:2(11Z,14Z)/18:2(9Z,12Z))               | 215.92 | 887.56 | 0.28  | 0.33 | 0.85 | 0.03564 | -0.28 |
| POS | Betaine aldehyde                             | 331.80 | 102.09 | 1.01  | 0.73 | 0.84 | 0.16060 | 0.47  |
| POS | Palmitic amide                               | 34.38  | 256.26 | 0.06  | 0.06 | 0.83 | 0.15679 | -0.18 |
| POS | 2-acetyl-1-alkyl-sn-glycero-3-phosphocholine | 220.94 | 524.37 | 14.36 | 8.99 | 0.83 | 0.13978 | 0.68  |
| POS | LysoPC(16:1(9Z)/0:0)                         | 226.03 | 494.32 | 0.16  | 0.29 | 0.82 | 0.22621 | -0.81 |
| POS | LysoPE(0:0/18:3(6Z,9Z,12Z))                  | 230.79 | 476.27 | 0.07  | 0.03 | 0.81 | 0.00382 | 1.11  |
| POS | D-Alanine                                    | 52.27  | 90.06  | 0.30  | 0.51 | 0.80 | 0.07502 | -0.80 |
| POS | LysoPC(20:2(11Z,14Z))                        | 220.67 | 548.37 | 0.18  | 0.21 | 0.80 | 0.65503 | -0.18 |
| POS | LysoPC(17:0)                                 | 222.59 | 510.36 | 0.61  | 0.32 | 0.80 | 0.09737 | 0.92  |
| POS | hesperetin 3'-O-sulfate                      | 419.70 | 383.04 | 0.02  | 0.02 | 0.79 | 0.29097 | -0.20 |
| POS | Racemethionine                               | 313.51 | 150.06 | 1.80  | 1.84 | 0.78 | 0.95014 | -0.03 |
| POS | Cavipetin C                                  | 199.03 | 389.27 | 0.00  | 0.00 | 0.77 | 0.79696 | 0.14  |
| POS | gamma-Glutamylglutamic acid                  | 481.93 | 277.10 | 0.07  | 0.10 | 0.77 | 0.16592 | -0.46 |
| POS | PE(P-18:0/22:4(7Z,10Z,13Z,16Z))              | 164.18 | 780.59 | 0.23  | 0.30 | 0.76 | 0.17939 | -0.38 |

|     |                                       |        |        |        |        |      |         |       |
|-----|---------------------------------------|--------|--------|--------|--------|------|---------|-------|
| POS | 2-Methylbutyroylcarnitine             | 268.69 | 246.17 | 2.96   | 1.60   | 0.75 | 0.04204 | 0.89  |
| POS | Propionylcarnitine                    | 304.86 | 218.14 | 3.28   | 2.43   | 0.75 | 0.18638 | 0.43  |
| POS | Homocysteine thiolactone              | 189.73 | 118.03 | 0.09   | 0.11   | 0.74 | 0.15309 | -0.31 |
| POS | 1-Methyl-1,3-cyclohexadiene           | 36.71  | 95.09  | 0.05   | 0.07   | 0.74 | 0.01350 | -0.49 |
| POS | Deoxyguanosine                        | 186.44 | 268.10 | 6.87   | 8.92   | 0.74 | 0.29998 | -0.38 |
| POS | PE(20:5(5Z,8Z,11Z,14Z,17Z)/P-18:0)    | 61.68  | 750.54 | 1.39   | 1.36   | 0.74 | 0.84195 | 0.03  |
| POS | Adenosine 2'-phosphate                | 451.76 | 348.07 | 0.48   | 0.32   | 0.71 | 0.20426 | 0.57  |
| POS | N-Ornithyl-L-taurine                  | 241.80 | 240.10 | 0.05   | 0.03   | 0.71 | 0.19769 | 0.45  |
| POS | L-Palmitoylcarnitine                  | 205.70 | 400.34 | 5.37   | 6.69   | 0.71 | 0.21442 | -0.32 |
| POS | PI(20:2(11Z,14Z)/16:0)                | 220.94 | 863.56 | 0.04   | 0.04   | 0.71 | 0.64419 | -0.09 |
| POS | 5-Methylcytidine                      | 267.58 | 258.11 | 0.03   | 0.03   | 0.70 | 0.74679 | -0.12 |
| POS | Uridine                               | 181.20 | 245.08 | 0.09   | 0.08   | 0.69 | 0.69341 | 0.09  |
| POS | Valyl-Phenylalanine                   | 209.50 | 265.15 | 0.04   | 0.03   | 0.68 | 0.78737 | 0.11  |
| POS | (+)-2,3-Dihydro-3-methyl-1H-pyrrole   | 296.88 | 84.08  | 0.07   | 0.07   | 0.68 | 0.76714 | -0.07 |
| POS | 6-Hydroxy-1H-indole-3-acetamide       | 47.95  | 191.08 | 0.06   | 0.04   | 0.67 | 0.15593 | 0.45  |
| POS | Prolyl-Arginine                       | 472.38 | 272.17 | 0.03   | 0.03   | 0.66 | 0.51887 | -0.15 |
| POS | Linoleamide                           | 89.67  | 280.26 | 0.13   | 0.16   | 0.66 | 0.36383 | -0.32 |
| POS | PI(18:1(9Z)/18:1(9Z))                 | 220.49 | 880.59 | 0.07   | 0.08   | 0.66 | 0.59915 | -0.10 |
| POS | Hypoxanthine                          | 185.53 | 137.05 | 267.42 | 267.50 | 0.66 | 0.99711 | 0.00  |
| POS | PC(22:5(7Z,10Z,13Z,16Z,19Z)/16:1(9Z)) | 167.76 | 806.57 | 2.18   | 2.18   | 0.65 | 0.96683 | -0.01 |
| POS | PC(P-16:0/18:4(6Z,9Z,12Z,15Z))        | 165.94 | 738.54 | 0.23   | 0.26   | 0.64 | 0.27358 | -0.18 |
| POS | DL-Glutamate                          | 419.47 | 148.06 | 5.05   | 6.48   | 0.63 | 0.20513 | -0.36 |
| POS | 3-Hydroxyisovalerylcarnitine          | 327.29 | 262.16 | 0.28   | 0.16   | 0.63 | 0.02530 | 0.81  |
| POS | L-Arginine                            | 443.26 | 175.12 | 0.36   | 0.42   | 0.62 | 0.15149 | -0.21 |
| POS | Citicoline                            | 464.24 | 489.11 | 0.07   | 0.14   | 0.62 | 0.17285 | -0.93 |
| POS | 1-Hydroxy-3-methyl-9H-carbazole       | 365.18 | 198.09 | 0.01   | 0.01   | 0.62 | 0.72691 | 0.10  |
| POS | Octadecanamide                        | 168.09 | 284.29 | 0.03   | 0.06   | 0.62 | 0.22982 | -0.83 |
| POS | Ethyl N-ethylanthranilate             | 198.73 | 194.12 | 0.09   | 0.05   | 0.62 | 0.48946 | 0.64  |

|     |                                             |        |        |       |       |      |         |       |
|-----|---------------------------------------------|--------|--------|-------|-------|------|---------|-------|
| POS | PC(20:4(8Z,11Z,14Z,17Z)/15:0)               | 172.05 | 768.55 | 1.08  | 1.49  | 0.62 | 0.08000 | -0.47 |
| POS | 2,5-Dihydro-2,4-dimethyloxazole             | 414.37 | 100.09 | 0.08  | 0.12  | 0.61 | 0.36360 | -0.61 |
| POS | LysoPI(18:0/0:0)                            | 273.03 | 601.33 | 0.07  | 0.08  | 0.58 | 0.86978 | -0.07 |
| POS | Ecgonine                                    | 356.80 | 186.11 | 0.31  | 0.24  | 0.58 | 0.42467 | 0.33  |
| POS | Threoninyl-Arginine                         | 429.34 | 276.17 | 0.05  | 0.04  | 0.57 | 0.35509 | 0.26  |
| POS | Taurine                                     | 318.06 | 126.02 | 21.56 | 23.05 | 0.57 | 0.40014 | -0.10 |
| POS | 2-Methyl-5-(2-propenyl)pyrazine             | 239.95 | 135.09 | 0.07  | 0.09  | 0.57 | 0.12789 | -0.26 |
| POS | S-Adenosylhomocysteine                      | 418.69 | 385.13 | 0.07  | 0.09  | 0.55 | 0.11523 | -0.44 |
| POS | PC(20:1(11Z)/14:0)                          | 64.23  | 760.58 | 20.84 | 15.32 | 0.55 | 0.07234 | 0.44  |
| POS | O-Phosphoethanolamine                       | 488.55 | 142.03 | 4.53  | 4.91  | 0.55 | 0.51057 | -0.11 |
| POS | Alpha-dimorphecolic acid                    | 36.24  | 279.23 | 0.10  | 0.10  | 0.55 | 0.54683 | 0.06  |
| POS | LysoPE(0:0/20:4(5Z,8Z,11Z,14Z))             | 219.42 | 502.29 | 0.36  | 0.27  | 0.54 | 0.61876 | 0.43  |
| POS | Alanyl-Arginine                             | 438.08 | 246.16 | 0.29  | 0.34  | 0.54 | 0.42967 | -0.21 |
| POS | SM(d17:1/24:1(15Z))                         | 204.95 | 799.67 | 0.04  | 0.05  | 0.54 | 0.30299 | -0.30 |
| POS | Cytidine monophosphate                      | 454.04 | 324.06 | 0.12  | 0.07  | 0.53 | 0.01810 | 0.73  |
| POS | Nervonyl carnitine                          | 112.16 | 102.13 | 0.47  | 0.42  | 0.52 | 0.10951 | 0.14  |
| POS | Norophthalmic acid                          | 453.12 | 276.12 | 0.29  | 0.27  | 0.52 | 0.65349 | 0.13  |
| POS | Zymonic acid                                | 185.54 | 159.03 | 1.56  | 1.55  | 0.51 | 0.94303 | 0.01  |
| POS | trans-Hexadec-2-enoyl carnitine             | 206.35 | 398.33 | 1.12  | 0.98  | 0.51 | 0.42104 | 0.19  |
| POS | PC(P-18:1(11Z)/22:6(4Z,7Z,10Z,13Z,16Z,19Z)) | 162.32 | 816.59 | 0.03  | 0.03  | 0.51 | 0.42157 | -0.30 |
| POS | Prolyl-Threonine                            | 350.16 | 217.12 | 0.02  | 0.01  | 0.51 | 0.07729 | 0.61  |
| POS | Pisumionoside                               | 423.22 | 405.21 | 0.25  | 0.30  | 0.51 | 0.28447 | -0.25 |
| POS | Glutaminyllysine                            | 469.64 | 275.17 | 0.03  | 0.02  | 0.51 | 0.41359 | 0.20  |
| POS | 1H-Indole-3-carboxaldehyde                  | 70.32  | 146.06 | 0.01  | 0.10  | 2.50 | 0.05119 | -3.59 |
| POS | beta-Alanine                                | 389.05 | 90.06  | 0.30  | 0.38  | 1.64 | 0.05647 | -0.35 |
| POS | alpha-Terpinyl glucoside                    | 419.94 | 317.19 | 0.01  | 0.01  | 1.28 | 0.05749 | -1.10 |
| POS | PC(22:4(7Z,10Z,13Z,16Z)/15:0)               | 170.40 | 796.58 | 0.27  | 0.33  | 1.16 | 0.06510 | -0.28 |
| POS | LysoPC(16:0)                                | 224.49 | 496.34 | 29.15 | 14.82 | 1.01 | 0.06617 | 0.98  |

|     |                                                       |        |        |       |       |      |         |       |
|-----|-------------------------------------------------------|--------|--------|-------|-------|------|---------|-------|
| POS | 3-Hydroxyadipic acid 3,6-lactone                      | 329.03 | 145.05 | 0.12  | 0.11  | 1.36 | 0.06779 | 0.11  |
| POS | PE(P-18:1(11Z)/22:4(7Z,10Z,13Z,16Z))                  | 165.03 | 778.57 | 0.45  | 0.59  | 1.04 | 0.06800 | -0.37 |
| POS | PE(20:4(8Z,11Z,14Z,17Z)/P-16:0)                       | 62.54  | 724.53 | 1.50  | 2.00  | 1.32 | 0.07125 | -0.41 |
| POS | Creatine                                              | 370.88 | 132.08 | 59.51 | 53.81 | 1.42 | 0.07850 | 0.15  |
| POS | LysoPC(22:0)                                          | 216.23 | 580.43 | 0.05  | 0.03  | 1.16 | 0.07881 | 1.03  |
| POS | Ergothioneine                                         | 351.09 | 230.09 | 0.01  | 0.02  | 1.26 | 0.08258 | -2.02 |
| POS | LysoPC(22:4(7Z,10Z,13Z,16Z))                          | 218.23 | 572.37 | 0.03  | 0.04  | 1.47 | 0.08384 | -0.67 |
| POS | 1-Kestose                                             | 473.40 | 527.16 | 0.02  | 0.01  | 1.01 | 0.08706 | 0.59  |
| POS | 3-Aminocaproic acid                                   | 38.09  | 132.10 | 0.37  | 0.53  | 1.11 | 0.08759 | -0.52 |
| POS | 5-Aminopentanamide                                    | 304.14 | 117.10 | 0.20  | 0.14  | 1.04 | 0.09030 | 0.50  |
| POS | Isoleucyl-Threonine                                   | 51.18  | 233.15 | 0.15  | 0.20  | 1.17 | 0.09829 | -0.45 |
| POS | D-Proline                                             | 333.96 | 116.07 | 14.37 | 19.37 | 1.91 | 0.10221 | -0.43 |
| POS | 1-Methyl 2-galloylgalactarate                         | 443.10 | 377.07 | 0.03  | 0.02  | 1.23 | 0.10486 | 0.24  |
| POS | N-Methylalanine                                       | 48.62  | 104.07 | 0.48  | 0.71  | 1.25 | 0.10958 | -0.55 |
| POS | L-Asparagine                                          | 412.04 | 133.06 | 0.32  | 0.47  | 1.36 | 0.11323 | -0.56 |
| POS | PS(20:0/20:4(5Z,8Z,11Z,14Z))                          | 221.62 | 840.57 | 0.10  | 0.15  | 1.17 | 0.11549 | -0.52 |
| POS | SM(d18:1/20:0)                                        | 207.27 | 759.64 | 0.11  | 0.09  | 1.76 | 0.13151 | 0.29  |
| POS | Alanyl-Threonine                                      | 67.94  | 191.10 | 0.04  | 0.07  | 1.05 | 0.15056 | -0.65 |
| POS | PE(P-18:1(11Z)/16:0)                                  | 172.19 | 702.54 | 0.25  | 0.33  | 1.25 | 0.15610 | -0.40 |
| POS | Cytosine                                              | 218.95 | 112.05 | 0.40  | 0.57  | 1.04 | 0.15885 | -0.51 |
| POS | Inosine                                               | 238.15 | 269.09 | 5.00  | 4.29  | 1.38 | 0.16581 | 0.22  |
| POS | 1-(Hydroxymethyl)-5,5-dimethyl-2,4-imidazolidinedione | 418.77 | 159.08 | 0.16  | 0.27  | 1.00 | 0.17678 | -0.79 |
| POS | Guanosine                                             | 287.53 | 284.10 | 0.81  | 0.67  | 1.04 | 0.18442 | 0.27  |
| POS | 1-Pyrroline                                           | 334.44 | 70.07  | 0.02  | 0.02  | 1.81 | 0.19607 | -0.41 |
| POS | Alanyl-Valine                                         | 45.37  | 189.12 | 0.16  | 0.20  | 1.14 | 0.20466 | -0.38 |
| POS | Dimethyl dialkyl ammonium chloride                    | 151.37 | 304.30 | 0.06  | 0.02  | 1.25 | 0.22105 | 2.01  |
| POS | 2,3-Dihydro-5-(3-hydroxypropanoyl)-1H-pyrrolizine     | 37.08  | 180.10 | 0.24  | 0.32  | 1.07 | 0.23304 | -0.43 |
| POS | 5-Aminopentanoic acid                                 | 407.87 | 118.09 | 0.58  | 1.01  | 1.64 | 0.24339 | -0.79 |

|     |                                                |        |        |      |       |      |         |       |
|-----|------------------------------------------------|--------|--------|------|-------|------|---------|-------|
| POS | N-a-Acetyl-L-arginine                          | 392.77 | 217.13 | 0.03 | 0.04  | 1.02 | 0.27515 | -0.38 |
| POS | LysoPC(P-16:0)                                 | 216.16 | 480.34 | 0.51 | 0.67  | 1.13 | 0.29620 | -0.39 |
| POS | Taurochenodeoxycholate-7-sulfate               | 263.81 | 530.27 | 0.01 | 0.01  | 1.21 | 0.30046 | 0.27  |
| POS | Thiomorpholine 3-carboxylate                   | 391.85 | 148.04 | 1.20 | 1.34  | 1.05 | 0.37369 | -0.16 |
| POS | Arachidonyl carnitine                          | 197.83 | 504.40 | 0.02 | 0.02  | 1.19 | 0.37995 | -0.41 |
| POS | N6-Methyladenosine                             | 308.76 | 282.12 | 0.17 | 0.23  | 1.47 | 0.38155 | -0.45 |
| POS | Thesinine 4'-O-glucoside                       | 431.38 | 450.21 | 0.00 | 0.00  | 1.27 | 0.38622 | 0.44  |
| POS | Ophthalmic acid                                | 421.43 | 290.13 | 0.02 | 0.02  | 1.57 | 0.42180 | 0.27  |
| POS | Piperidine                                     | 291.37 | 86.10  | 1.46 | 1.75  | 1.35 | 0.45981 | -0.27 |
| POS | 3,3,5-triiodo-L-thyronine-beta-D-glucuronoside | 291.90 | 132.10 | 9.49 | 11.27 | 1.36 | 0.46481 | -0.25 |
| POS | SM(d18:1/18:1(9Z))                             | 207.30 | 729.59 | 0.61 | 0.56  | 1.38 | 0.46636 | 0.11  |
| POS | D-Serine                                       | 409.73 | 106.05 | 0.18 | 0.23  | 1.44 | 0.52621 | -0.32 |
| POS | 1-Methylguanosine                              | 217.98 | 298.11 | 0.08 | 0.10  | 1.40 | 0.59223 | -0.31 |
| POS | Norvaline                                      | 326.36 | 118.09 | 5.35 | 5.92  | 1.14 | 0.62722 | -0.15 |
| POS | Pyrrolidine                                    | 326.94 | 72.08  | 0.10 | 0.12  | 1.26 | 0.62775 | -0.19 |
| POS | Ethyl 2-aminobenzoate                          | 288.25 | 166.09 | 6.38 | 7.41  | 1.21 | 0.62898 | -0.21 |
| POS | ( $\Delta^{\pm}$ )-erythro-Isoleucine          | 302.43 | 132.10 | 7.64 | 8.41  | 1.19 | 0.64007 | -0.14 |
| POS | N-gamma-L-Glutamyl-D-alanine                   | 322.41 | 219.10 | 0.02 | 0.02  | 1.06 | 0.65642 | -0.15 |
| POS | 7-Methylinosine                                | 157.78 | 283.10 | 0.04 | 0.05  | 1.12 | 0.81728 | -0.10 |
| POS | N2,N2-Dimethylguanosine                        | 213.81 | 312.13 | 0.04 | 0.05  | 1.13 | 0.83111 | -0.17 |
| POS | 3'-O-Methylguanosine                           | 252.92 | 298.11 | 0.01 | 0.01  | 1.71 | 0.99765 | 0.00  |
| POS | Inosinic acid                                  | 468.34 | 349.05 | 0.05 | 0.02  | 1.00 | 0.03522 | 1.55  |

Note. rt: retention time; m/z: mass-to-charge ratio; VIP: variable importance in the projection; FC: fold change; GC:gastric cancer; PC: paracancerous; NEG: negative ion mode; POS: positive ion mode.

Table S2 Gene symbols related to metabolite pathways

|        |       |         |         |          |         |          |         |              |           |        |        |         |
|--------|-------|---------|---------|----------|---------|----------|---------|--------------|-----------|--------|--------|---------|
| SPTLC1 | ACER1 | PLPP3   | GALC    | CKMT1A   | ALDH3A2 | NOS3     | DAO     | PAICS        | PNP       | ENTPD8 | GDA    | ADCY4   |
| SPTLC2 | ACER3 | PLPP2   | GAL3ST1 | CKMT2    | ALDH1B1 | ARG2     | L3HYPDH | ADSL         | HPRT1     | ENTPD1 | GUK1   | ADCY5   |
| SPTLC3 | DEGS1 | SGPP1   | ARSA    | CKB      | ALDH7A1 | ARG1     | NUDT9   | ATIC         | IMPDH1    | CANT1  | PKM    | ADCY6   |
| KDSR   | DEGS2 | SGPP2   | NEU1    | CKMT1B   | ALDH9A1 | OAT      | ADPRM   | APRT         | IMPDH2    | ENTPD4 | PKLR   | ADCY7   |
| CERS1  | SGMS1 | SPHK1   | NEU3    | AZIN2    | CNDP1   | PYCR3    | NUDT5   | NT5C2        | NME6      | ENTPD5 | RRM1   | ADCY8   |
| CERS2  | SGMS2 | SPHK2   | NEU4    | AGMAT    | CNDP2   | PYCR2    | PGM1    | NT5C1A       | NME7      | ENTPD6 | RRM2B  | ADCY9   |
| CERS4  | SMPD1 | SGPL1   | NEU2    | ODC1     | CARNS1  | PYCR1    | PGM2    | NT5C1B       | NME2      | NUDT16 | RRM2   | ADCY10  |
| CERS3  | SMPD2 | UGCG    | GLA     | SRM      | SAT2    | PRODH    | PRPS1L1 | NT5C         | NME4      | ITPA   | DGUOK  | GUCY1A2 |
| CERS6  | SMPD3 | GBA     | PSAP    | SMS      | SAT1    | ALDH18A1 | PRPS2   | NT5M         | NME1      | XDH    | HDDC3  | GUCY1A1 |
| CERS5  | SMPD4 | GBA2    | PSAPL1  | AMD1     | MAOB    | LAP3     | PRPS1   | NT5C1B-RDH14 | NME3      | NUDT2  | PRUNE1 | GUCY1B1 |
| ASAH1  | ENPP7 | B4GALT6 | GATM    | AOC1     | MAOA    | P4HA     | PPAT    | NT5E         | NME1-NME2 | GMPS   | ADCY1  | GUCY2C  |
| ASAH2  | CERK  | GLB1    | GAMT    | SMOX     | NOS1    | PRODH2   | GART    | NT5C3A       | AK9       | GMPR   | ADCY2  | GUCY2D  |
| ACER2  | PLPP1 | UGT8    | CKM     | ALDH2    | NOS2    | HOGA1    | PFAS    | NT5C3B       | ENTPD3    | GMPR2  | ADCY3  | GUCY2F  |
| NPR1   | PDE6G | ADA2    | FHIT    | COASY    | GPD2    | GNPAT    | DGKG    | PLA2G2E      | PLA2G4D   | PNPLA7 | ETNPPL | MBOAT7  |
| NPR2   | PDE6H | AK7     | ENPP4   | AASDHPPT | GPAM    | LPIN1    | DGKQ    | PLA2G3       | PLA2G4F   | GPCPD1 | PEMT   | GOT1    |

|       |        |         |         |       |        |        |         |               |         |          |        |         |
|-------|--------|---------|---------|-------|--------|--------|---------|---------------|---------|----------|--------|---------|
| PDE1A | PDE9A  | AK4     | PAPSS   | VNN1  | GPAT2  | LPIN3  | DGKK    | PLA2G2F       | PLA2G6  | CHAT     | CDS1   | GOT1L1  |
| PDE1B | PDE10A | AK5     | ENPP1_3 | VNN2  | GPAT4  | LPIN2  | CHPT1   | PLA2G12A      | PLB1    | ACHE     | CDS2   | GOT2    |
| PDE1C | PDE11A | AK2     | PRHOXNB | VNN3  | GPAT3  | PLPP5  | CEPT1   | PLA2G12B      | PLAAT3  | CHKA     | PLA1A  | TAT     |
| PDE2A | ADSS1  | AK1     | ALLC    | BCAT2 | AGPAT1 | PLPP4  | PLD1    | PLA2G1B       | LPCAT2  | CHKB     | PTDSS1 | IL4I1   |
| PDE3A | ADSS2  | AK6     | PANK1   | BCAT1 | AGPAT2 | DGKZ   | PLD2    | PLA2G5        | LPCAT1  | PHOSPHO1 | PTDSS2 | PAH     |
| PDE3B | AMPD2  | AK3     | PANK3   | DPYD  | AGPAT3 | DGKD   | PLD3    | PLA2G2A       | LPCAT4  | PCYT1B   | PISD   | DDO     |
| PDE5A | AMPD3  | ENTPD2  | PANK2   | DPYS  | AGPAT4 | DGKI   | PLD4    | PLA2G2C       | LPCAT3  | PCYT1A   | PGS1   | ASRGL1  |
| PDE6A | AMPD1  | NTPCR   | PPCS    | UPB1  | AGPAT5 | DGKA   | LCAT    | PLA2G4E       | LYPLA1  | SELENOI  | CRLS1  | ASNS    |
| PDE6B | ADK    | PDE4    | PPCDC   | GADL1 | LCLAT1 | DGKE   | PLA2G10 | PLA2G4A       | PLA2G15 | ETNK1    | TAZ    | NIT2    |
| PDE6C | DCK    | PDE7    | ENPP1   | GPD1L | MBOAT1 | DGKB   | PLA2G2D | JMJD7-PLA2G4B | LYPLA2  | ETNK2    | LPGAT1 | GPT2    |
| PDE6D | ADA    | PDE8    | ENPP3   | GPD1  | MBOAT2 | DGKH   | PLA2G4C | PLA2G4B       | PNPLA6  | PCYT2    | CDIPT  | GPT     |
| AGXT  | AGXT2  | ASS1    | ASL     | NAT8L | RIMKLB | RIMKLA | FOLH1   | ASPA          | GAD1    | GAD2     | ABAT   | ALDH5A1 |
| GLUD2 | GLUD1  | ALDH4A1 | GLUL    | CAD   | GLS2   | GLS    | CPS1    | GFPT2         | GFPT1   |          |        |         |
